# Supplementary material for: Genotyping Test with Clinical Factors: Better Management of Acute Postoperative Pain?
Source: Int J Mol Sci. 2015 Mar 19;16(3):6298–311. doi: 10.3390/ijms16036298 (PMC4394533; doi:10.3390/ijms16036298)
Supplement: Supplementary file 1 [file ijms-16-06298-s001.pdf]

## Supplementary Information

**Table S1.** Association between *OPRM1* SNP and sedation at 24 h (No statistical difference  $p > 0.05$ ; Fisher Exact Test).

| Gene         | Genotype | Sedation at 24 h                     |                        |                                   | Total |
|--------------|----------|--------------------------------------|------------------------|-----------------------------------|-------|
|              |          | Cooperative, Orientated and Tranquil | Responding to Commands | Responding to Tactile Stimulation |       |
| <i>OPRM1</i> | AA       | 67 (79.8%)                           | 8 (80.0%)              | 1 (100.0%)                        | 76    |
|              | AG       | 15 (17.9%)                           | 2 (20.0%)              | 0 (0.0%)                          | 17    |
|              | GG       | 2 (2.4%)                             | 0 (0.0%)               | 0 (0.0%)                          | 2     |
| Total        |          | 84 (100.0%)                          | 10 (100.0%)            | 1 (100.0%)                        | 95    |

**Table S2.** Association between *OPRM1* SNP and nausea at 24 h (No statistical difference  $p > 0.05$ ; Fisher Exact Test).

| Gene         | Genotype | Sedation at 24 h  |                         |                                    | Total |
|--------------|----------|-------------------|-------------------------|------------------------------------|-------|
|              |          | Absence of Nausea | Mild to Moderate Nausea | Severe Nausea Requiring Antiemetic |       |
| <i>OPRM1</i> | AA       | 65 (79.3%)        | 8 (80.0%)               | 3 (100.0%)                         | 76    |
|              | AG       | 15 (18.3%)        | 2 (20.0%)               | 0 (0%)                             | 17    |
|              | GG       | 2 (2.4%)          | 0 (0.0%)                | 0 (0%)                             | 2     |
| Total        |          | 84 (100.0%)       | 10 (100.0%)             | 3 (100.0%)                         | 95    |

**Table S3.** Association between *OPRM1* SNP and vomiting at 24 h (No statistical difference  $p > 0.05$ ; Fisher Exact Test).

| Gene         | Genotype | Vomiting at 24 h |            | Total |
|--------------|----------|------------------|------------|-------|
|              |          | Vomiting –       | Vomiting + |       |
| <i>OPRM1</i> | AA       | 75 (79.8%)       | 1 (100.0%) | 76    |
|              | AG       | 17 (18.1%)       | 0 (100.0%) | 17    |
|              | GG       | 2 (2.1%)         | 0 (100.0%) | 2     |
| Total        |          | 94 (100.0%)      | 1 (100.0%) | 95    |

**Table S4.** Association between *ABCB1* SNP and sedation at 24 h (No statistical difference  $p > 0.05$ ; Fisher Exact Test).

| Gene         | Genotype | Sedation at 24 h                     |                        |                                   | Total |
|--------------|----------|--------------------------------------|------------------------|-----------------------------------|-------|
|              |          | Cooperative, Orientated and Tranquil | Responding to Commands | Responding to Tactile Stimulation |       |
| <i>ABCB1</i> | CC       | 30 (35.7%)                           | 3 (30.0%)              | 0 (0%)                            | 33    |
|              | CT       | 33 (39.3%)                           | 4 (40.0%)              | 1 (100.0%)                        | 38    |
|              | TT       | 21 (25.0%)                           | 3 (30.0%)              | 0 (0%)                            | 24    |
| Total        |          | 84 (100.0%)                          | 10 (100.0%)            | 1 (100.0%)                        | 95    |

**Table S5.** Association between *ABCB1* SNP and nausea at 24 h (No statistical difference  $p > 0.05$ ; Fisher Exact Test).

| Gene         | Genotype | Sedation at 24 h  |                         |                                    | Total |
|--------------|----------|-------------------|-------------------------|------------------------------------|-------|
|              |          | Absence of Nausea | Mild to Moderate Nausea | Severe Nausea Requiring Antiemetic |       |
| <i>ABCB1</i> | CC       | 28 (34.1%)        | 3 (30.0%)               | 2 (66.7%)                          | 33    |
|              | CT       | 34 (41.5%)        | 4 (40.0%)               | 0 (0.0%)                           | 38    |
|              | TT       | 20 (24.4%)        | 3 (30.0%)               | 1 (33.3%)                          | 24    |
| Total        |          | 82 (100.0%)       | 10 (100.0%)             | 3 (100.0%)                         | 95    |

**Table S6.** Association between *ABCB1* SNP and vomiting at 24 h (No statistical difference  $p > 0.05$ ; Fisher Exact Test).

| Gene         | Genotype | Vomiting at 24 h |            | Total |
|--------------|----------|------------------|------------|-------|
|              |          | Vomiting –       | Vomiting + |       |
| <i>ABCB1</i> | CC       | 32 (34.0%)       | 1 (100.0%) | 33    |
|              | CT       | 38 (40.4%)       | 0 (100.0%) | 38    |
|              | TT       | 24 (25.5%)       | 0 (100.0%) | 24    |
| Total        |          | 94 (100.0%)      | 1 (100.0%) | 95    |

**Table S7.** Association between age, weight, duration of the operation and sedation at 24 h (No statistical difference  $p > 0.05$ ; Fisher Exact Test).

| Characteristics of the Subjects | Sedation at 24 h                     | N  | Mean   | Std. Deviation | Sig.  |
|---------------------------------|--------------------------------------|----|--------|----------------|-------|
| Age                             | Cooperative, orientated and tranquil | 84 | 51.88  | 13.956         | 0.164 |
|                                 | Responding to commands               | 10 | 43.50  | 13.591         |       |
|                                 | Responding to tactile stimulation    | 1  | 58.00  |                |       |
| Weight                          | Cooperative, orientated and tranquil | 84 | 75.40  | 14.842         | 0.360 |
|                                 | Responding to commands               | 10 | 74.90  | 14.012         |       |
|                                 | Responding to tactile stimulation    | 1  | 94.00  |                |       |
| Duration of the operation       | Cooperative, orientated and tranquil | 80 | 213.62 | 115.531        | 0.244 |
|                                 | Responding to commands               | 9  | 171.11 | 66.978         |       |
|                                 | Responding to tactile stimulation    | 1  | 360.00 |                |       |

**Table S8.** Association between age, weight, duration of the operation and nausea at 24 h (No statistical difference  $p > 0.05$ ; Fisher Exact Test).

| Characteristics of the Subjects | Nausea at 24 h                     | N  | Mean  | Std. Deviation | Sig.  |
|---------------------------------|------------------------------------|----|-------|----------------|-------|
| Age                             | Absence of nausea                  | 82 | 50.04 | 14.019         | 0.215 |
|                                 | Mild to moderate nausea            | 10 | 56.50 | 13.159         |       |
|                                 | Severe nausea requiring antiemetic | 3  | 61.00 | 13.229         |       |
| Weight                          | Absence of nausea                  | 82 | 75.77 | 15.371         | 0.382 |
|                                 | Mild to moderate nausea            | 10 | 72.00 | 10.593         |       |
|                                 | Severe nausea requiring antiemetic | 3  | 81.33 | 3.215          |       |

**Table S8. Cont.**

| Characteristics of the Subjects | Nausea at 24 h                     | N  | Mean   | Std. Deviation | Sig.  |
|---------------------------------|------------------------------------|----|--------|----------------|-------|
| Duration of the operation       | Absence of nausea                  | 78 | 210.96 | 115.292        | 0.589 |
|                                 | Mild to moderate nausea            | 9  | 227.22 | 103.595        |       |
|                                 | Severe nausea requiring antiemetic | 3  | 163.33 | 66.583         |       |

**Table S9.** Association between age, weight, duration of the operation and vomiting at 24 h (No statistical difference  $p > 0.05$ ; Fisher Exact Test).

| Characteristics of the Subjects | Vomiting   | N  | Mean   | Std. Deviation | Sig.  |
|---------------------------------|------------|----|--------|----------------|-------|
| Age                             | Vomiting – | 94 | 51.01  | 14.097         | 0.841 |
|                                 | Vomiting + | 1  | 56.00  |                |       |
| Weight                          | Vomiting – | 94 | 75.51  | 14.805         | 0.756 |
|                                 | Vomiting + | 1  | 79.00  |                |       |
| Duration of the operation       | Vomiting – | 89 | 210.67 | 113.145        | 0.562 |
|                                 | Vomiting + | 1  | 240.00 |                |       |

**Table S10.** Association between *OPRM1* SNP and VAS scores at rest and on movement (No statistical difference  $p > 0.05$ ; Fisher Exact Test).

| VAS at 24 h  | Genotypes | N  | Mean | Std. Deviation | Sig.                         |
|--------------|-----------|----|------|----------------|------------------------------|
| VAS rest     | AA        | 76 | 0.96 | 1.321          | 0.982<br>Kruskal Wallis test |
|              | AG        | 17 | 1.06 | 1.749          |                              |
|              | GG        | 2  | 1.00 | 1.414          |                              |
|              | Total     | 95 | 0.98 | 1.391          |                              |
| VAS movement | AA        | 76 | 1.86 | 1.671          | 0.691<br>Kruskal Wallis test |
|              | AG        | 17 | 2.29 | 2.085          |                              |
|              | GG        | 2  | 2.50 | 2.121          |                              |
|              | Total     | 95 | 1.95 | 1.747          |                              |

**Table S11.** Association between *ABCB1* SNP and VAS scores at rest and on movement (No statistical difference  $p > 0.05$ ; Fisher Exact Test).

| VAS at 24 h  | Genotypes | N  | Mean | Std. Deviation | p-Value                      |
|--------------|-----------|----|------|----------------|------------------------------|
| VAS rest     | CC        | 33 | 0.91 | 1.444          | 0.724<br>Kruskal Wallis test |
|              | CT        | 38 | 1.03 | 1.498          |                              |
|              | TT        | 24 | 1.00 | 1.180          |                              |
|              | Total     | 95 | 0.98 | 1.391          |                              |
| VAS movement | CC        | 33 | 2.06 | 1.638          | 0.582<br>Kruskal Wallis test |
|              | CT        | 38 | 2.03 | 1.924          |                              |
|              | TT        | 24 | 1.67 | 1.633          |                              |
|              | Total     | 95 | 1.95 | 1.747          |                              |

**Table S12.** Association between *age*, weight, duration of the operation and VAS scores at rest and on movement (No statistical difference  $p > 0.05$ ; Fisher Exact Test).

| VAS at 24 h  |                     | Age    | Weight | Duration of the Operation |
|--------------|---------------------|--------|--------|---------------------------|
| VAS rest     | Pearson Correlation | −0.117 | −0.026 | 0.225                     |
|              | Sig. (2-tailed)     | 0.258  | 0.803  | 0.033 *                   |
|              | <i>N</i>            | 95     | 95     | 90                        |
| VAS movement | Pearson Correlation | −0.120 | −0.043 | 0.116                     |
|              | Sig. (2-tailed)     | 0.248  | 0.681  | 0.276                     |
|              | <i>N</i>            | 95     | 95     | 90                        |

\* Statistically significant result.
